# Supplementary material
Source: Elsevier journal article supplement (https://www.sciencedirect.com/science/article/pii/S1579212920301555)
Supplement: mmc1 [file S1579212920301555:mmc1.pdf]

## ANEXO

### Encuesta de actitudes de los/as ENFERMEROS/AS ante la punción arterial para gasometría

#### DATOS SOCIO-LABORALES

Unidad en la que trabajas \*

- Hospitalización de neumología
- Urgencias

Provincia en la que ejerces

- Araba
- Bizkaia
- Gipuzkoa

Antigüedad en el servicio \*

- Menos de 2 años
- 2-5 años
- 6-10 años
- Más de 10 años

#### ENCUESTA DE ACTITUDES

¿Cuántas gasometrías mediante punción arterial has realizado aproximadamente en el último mes? \*

- Ninguna
- Menos de 10
- Diez o más

En una escala de 0-5... ¿Cómo calificarías tu nivel de destreza en la extracción de sangre arterial para gasometría? \*

|          |   |   |   |   |   |   |         |
|----------|---|---|---|---|---|---|---------|
| APRENDIZ | 0 | 1 | 2 | 3 | 4 | 5 | EXPERTO |
|----------|---|---|---|---|---|---|---------|

¿Realizas la prueba de Allen de forma previa a la punción arterial?

- Nunca / Casi nunca
- Alguna vez / Ocasionalmente
- A menudo / Frecuentemente
- Siempre / Casi siempre

¿Qué arteria empleas con mayor frecuencia para la extracción de sangre para gasometría?

- Radial, en la muñeca
- Humeral, en la flexura del brazo.
- Femoral

En una escala EVA/NRS de valoración del dolor... ¿Qué puntuación consideras que recibiría (de media) una punción arterial para gasometría (realizada sin complicaciones)?

¿Adminstras anestesia mediante mepivacaína/lidocaína inyectada de forma previa a la punción arterial? \*

- Nunca / Casi nunca
- Alguna vez / Ocasionalmente
- A menudo / Frecuentemente
- Siempre / Casi siempre

Cuando no utilizas mepivacaína/lidocaína inyectada como medida anestésica ¿A qué se debe principalmente?

- Por desconocimiento de la técnica
- Porque no se hace en mi unidad
- Por falta de tiempo
- Porque no creo que suponga una ventaja
- Otro:

¿Conoces a otros/as compañeros/as que utilicen de forma habitual la mepivacaína/lidocaína como anestesia local previa a la gasometría?

- Sí, unos cuantos
- Sí, unos pocos
- No

¿Consideras que debería ser SIEMPRE recomendable la administración de mepivacaína/lidocaína inyectada de forma previa a la punción arterial para gasometría?

- Sí (salvo contraindicaciones)
- No
- No lo tengo claro
- Dependiendo del caso

Ya has terminado. Muchas gracias por tu colaboración.
